# Supplementary material
Source: PubMed Central journal article supplement (PMC3522169)
Supplement: 3344f0f5bbb97efefdf0314d5bb6ba15_genetics.112.144253-1.pdf [file 3344f0f5bbb97efefdf0314d5bb6ba15_genetics.112.144253-1.pdf]

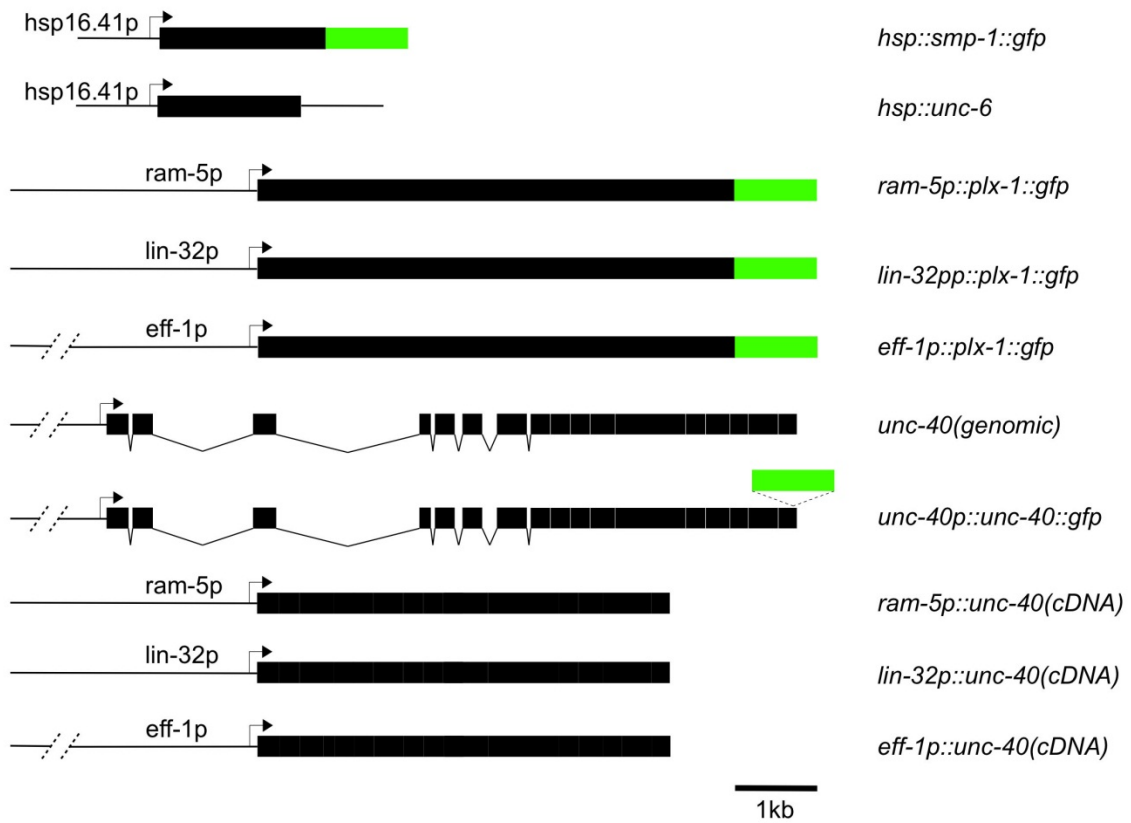

**Figure S1** Schematics of constructs. Constructs are those described in MATERIALS and METHODS. Black bars represent coding sequence for the gene whose function or localization is being examined, green bars represent green fluorescent protein encoding sequence, and thin lines represent 5' regulatory sequence or introns.
